# Supplementary material for: Reduced expression of mitochondrial complex I subunit Ndufs2 does not impact healthspan in mice
Source: PubMed Central journal article supplement (PMC8956724; doi:10.1038/s41598-022-09074-3), 2022-03-25
Supplement: 41598_2022_9074_MOESM1_ESM.pdf [file 41598_2022_9074_MOESM1_ESM.pdf]

## Supplemental Figures

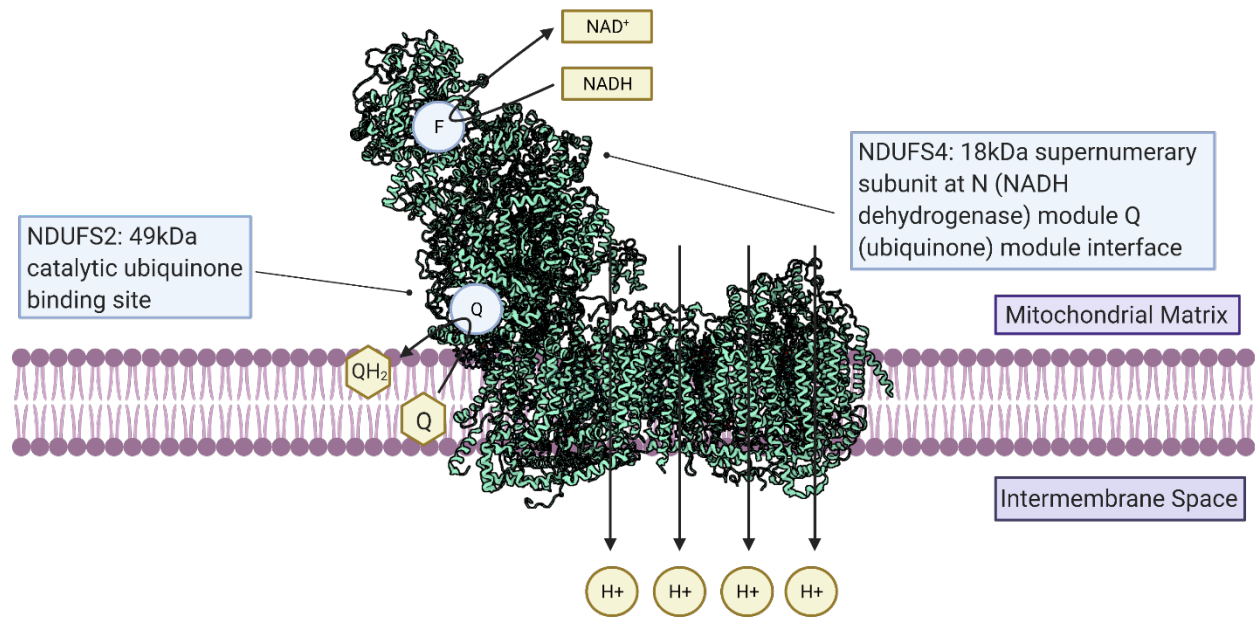

**Figure S1. Complex I Schematic.** *Ndufs2* encodes the 49kDa catalytic subunit of complex I and is therefore necessary for any enzymatic activity and assembly. *Ndufs4* encodes an 18kDa accessory subunit that is involved in complex assembly and stability and residual function of complex I is seen in tissues without NDUFS4. Created with [BioRender.com](https://www.biorender.com).

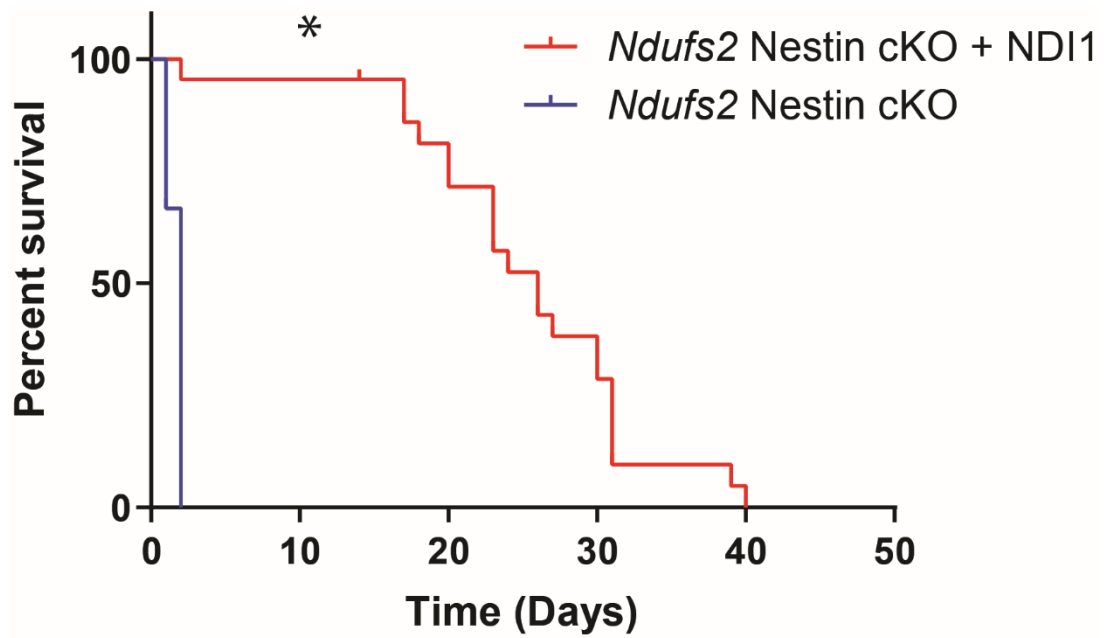

**Figure S2. *Ndufs2* deficiency in the brain is lethal and is partially rescued by expression of a yeast alternate NADH dehydrogenase.** Survival of Nestin cre mediated *Ndufs2* deficient mice with or without expression of the yeast alternate NADH dehydrogenase NDI1. Log-rank (Mantel-Cox) test \* $p < 0.0001$   $n = 22$  cKO=NDI1,  $n = 6$  cKO.

a)

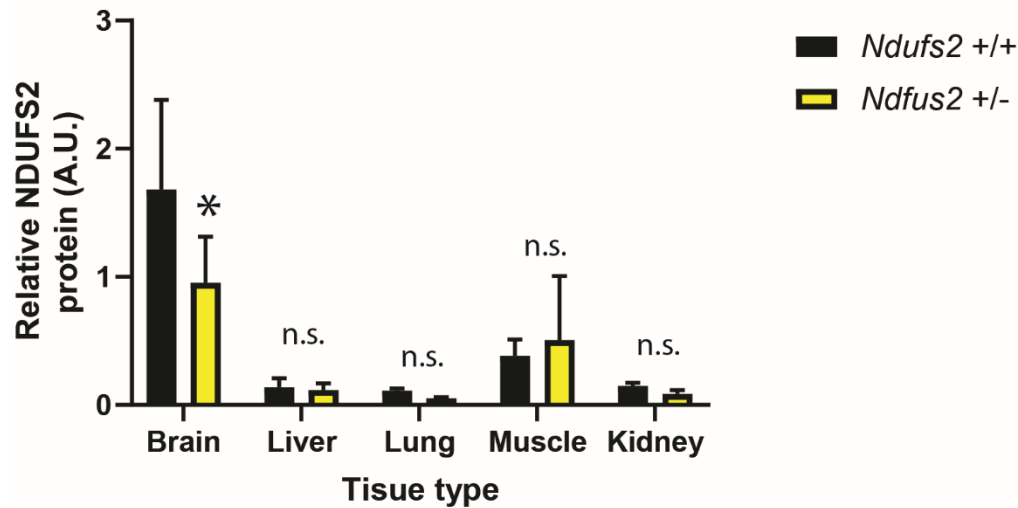

b)

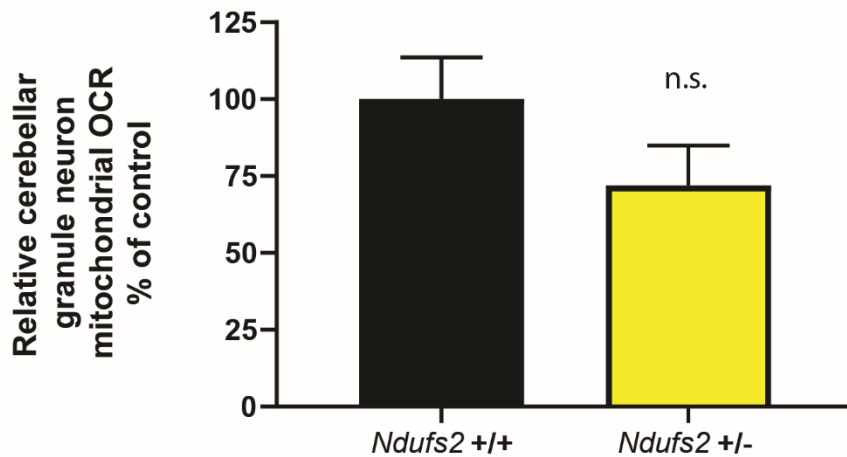

**Figure S3. NDUF52 quantification and neuronal basal OCR**

(a) Relative NDUF52 protein abundance in whole tissue. 2-way ANOVA column factor  $p = 0.1542$   $n = 3-4$  Sidak's multiple comparisons test  $*p < 0.05$

(b) Cerebellar granule neuron oxygen consumption rate. Unpaired T-test  $p = 0.1817$ .  $n = 5-7$ . n.s. not significant.

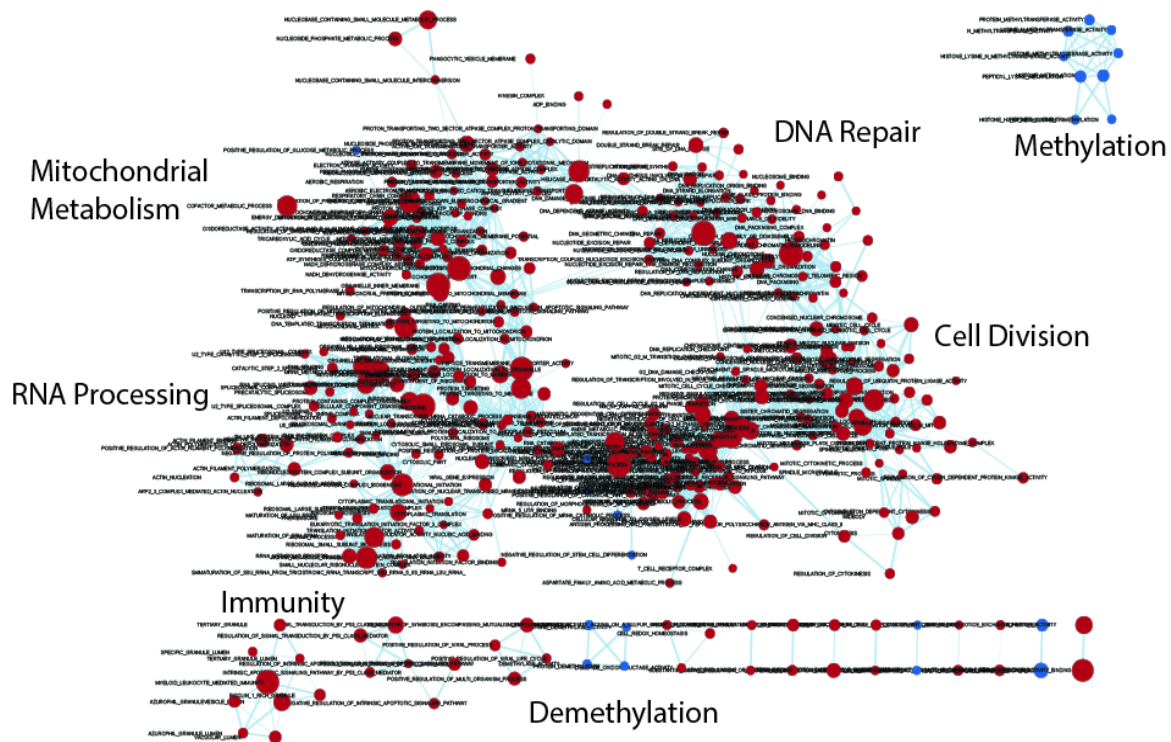

**Figure S4. Aged Treg Gene Ontology Enrichment Mapping.** Network analysis for gene ontology biological process gene set enrichment analysis of differential gene expression between 20-month-old regulatory T cells from *Ndufs2*<sup>+/+</sup> versus *Ndufs2*<sup>-/-</sup> mice. Key networks are identified. Red represents gene sets enriched in *Ndufs2*<sup>+/+</sup> and blue represents gene sets enriched in *Ndufs2*<sup>-/-</sup>. Circle size represents gene set size. Adjusted P value threshold 0.05.

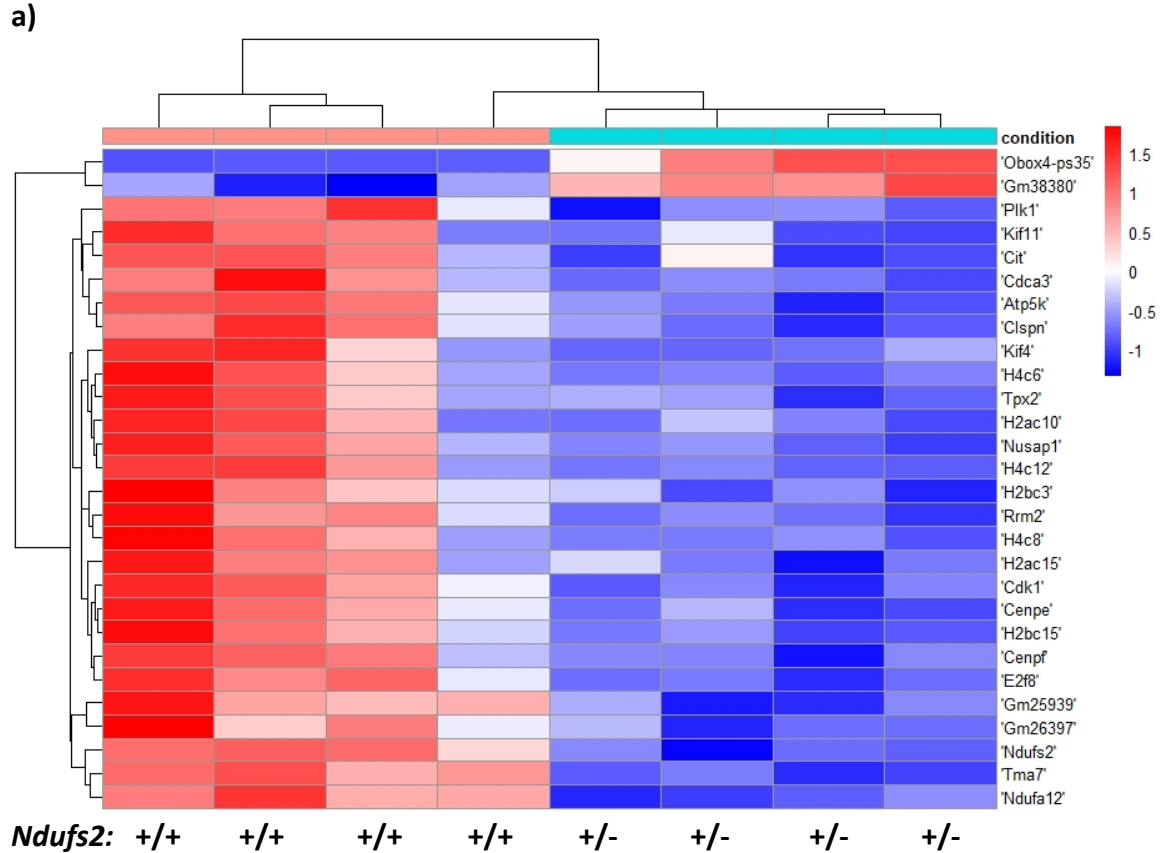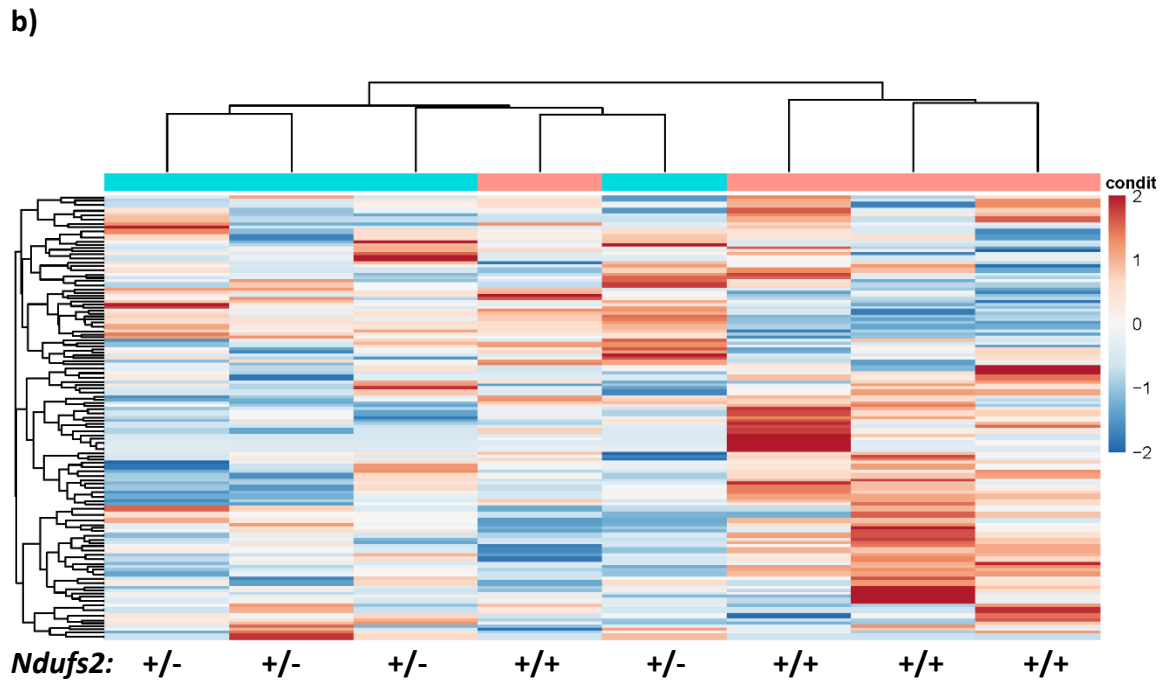

**Figure S5. Aged Treg transcriptomics**

a) Heat map of the most dysregulated in genes in aged Tregs from *Ndufs2*<sup>+/+</sup> vs *Ndufs2*<sup>+/-</sup> mice with a threshold of adjusted P value of 0.05 and log<sub>2</sub> fold change >1. Z scores calculated by row

and represented by blue-red spectrum, unsupervised hierarchical clustering of columns and rows.

**b)** Heat map of the integrated stress response genes in aged Tregs from *Ndufs2*<sup>+/+</sup> vs *Ndufs2*<sup>+/-</sup> mice. Z scores calculated by row and represented by blue-red spectrum, unsupervised hierarchical clustering of columns and rows.

a) Kidney

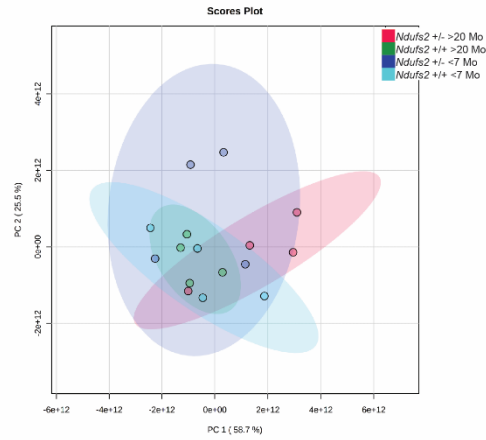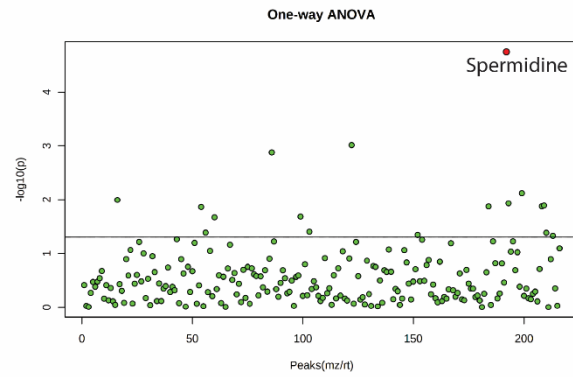

b) Liver

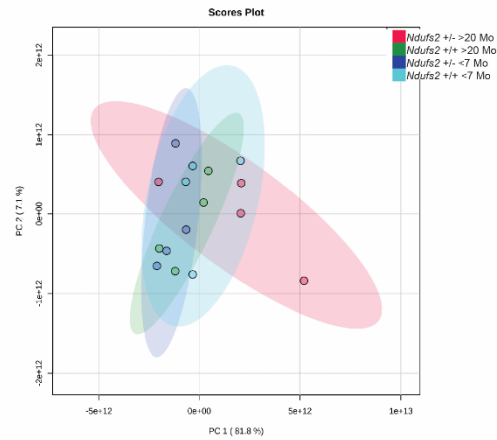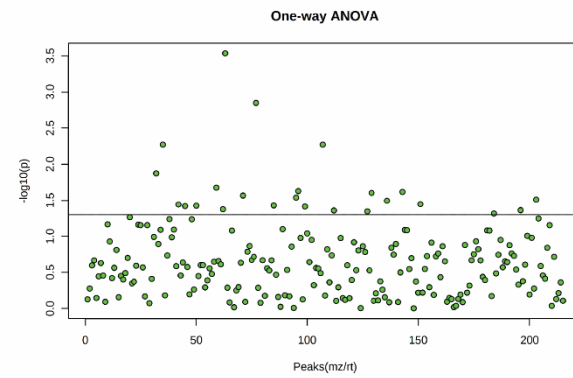

### Figure S6. Kidney and Liver metabolite levels

**a)** Kidney tissue metabolite measurements. Principal component analysis scores plot, one-way ANOVA results, with adjusted P value < 0.05 highlighted in red (spermidine). Young mice <7 months vs aged mice >20 months age matched by genotype. n=4.

**b)** Liver tissue metabolite measurements. Principal component analysis scores plot, one-way ANOVA results, with adjusted P value < 0.05 no significant metabolites. Young mice <7 months vs aged mice >20 months age matched by genotype. n = 4.

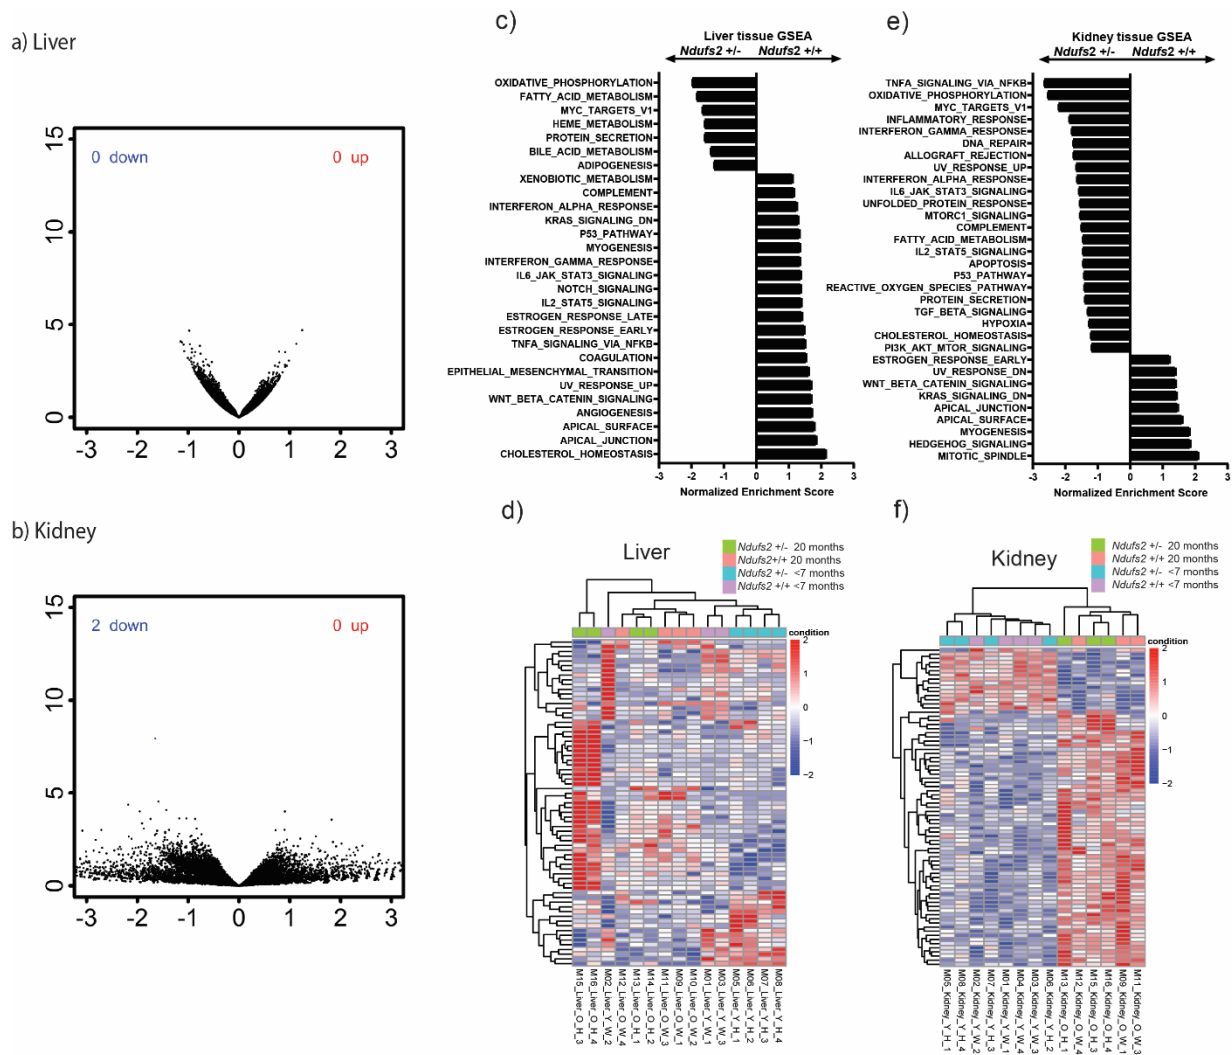

**Figure S7. Kidney and Liver transcriptomics**

**a)** Differential gene expression analysis in liver tissue at 20 months of age from *Ndufs2*<sup>+/+</sup> vs *Ndufs2*<sup>+/-</sup> mice. n=4. Volcano plot FDR cutoff of 0.05.

**b)** Differential gene expression analysis in kidney tissue at 20 months of age from *Ndufs2*<sup>+/+</sup> and *Ndufs2*<sup>+/-</sup> mice. n=3. Volcano plot FDR cutoff of 0.05.

**c)** GSEA in liver tissue at 20 months of age from *Ndufs2*<sup>+/+</sup> vs *Ndufs2*<sup>+/-</sup> mice. n=4 GSEA MSigDB hallmark gene sets with FDR cutoff of 0.25.

**d)** Differential gene expression analysis in liver tissue from young (<7 months) and old (20 months) *Ndufs2*<sup>+/+</sup> and *Ndufs2*<sup>+/-</sup> mice. 69 individual genes met ANOVA-like test FDR cutoff of 0.05. Unsupervised clustering of columns and rows.

**e)** GSEA in kidney tissue at 20 months of age. n=3. GSEA MSigDB hallmark gene sets with FDR cutoff of 0.25.

**f)** Differential gene expression analysis in kidney tissue from young (<7 months) and old (20 months) *Ndufs2*<sup>+/+</sup> and *Ndufs2*<sup>+/-</sup> mice. 77 individual genes met ANOVA-like test FDR cutoff of 0.05. Unsupervised clustering of columns and rows.



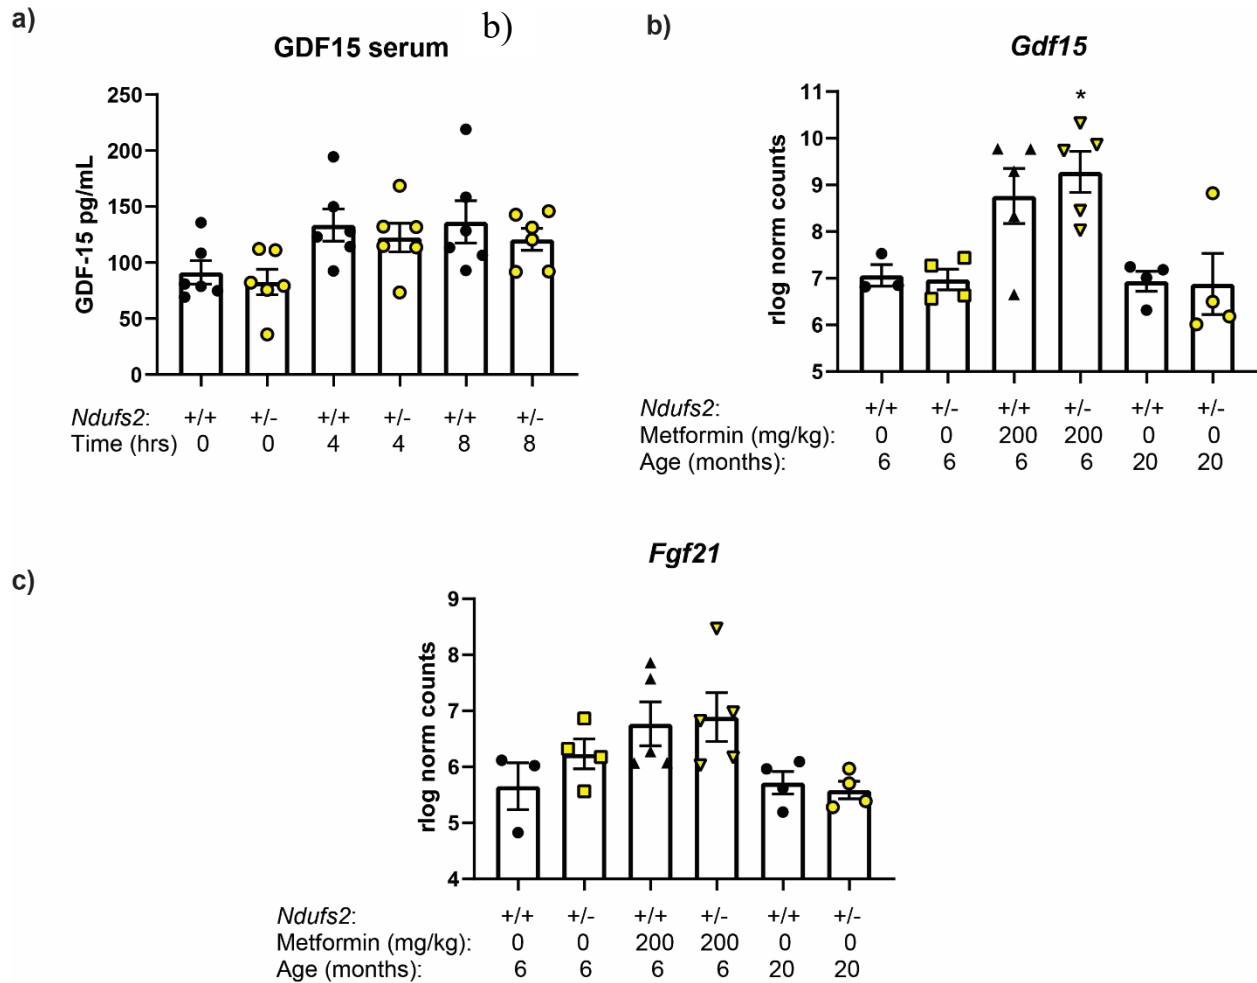

**Figure S8. *Gdf15* and *Fgf21* measurement**

**a)** Serum GDF-15 measurements 0, 4, and 8 hours after treatment with 200mg/Kg metformin in *Ndufs2*<sup>+/+</sup> and *Ndufs2*<sup>+/-</sup> mice. Ordinary one-way ANOVA p=0.0328, Sidak's multiple comparisons tests by genotype not significant. n=6. Error bars represent standard error.

**b)** Liver *Gdf15* mRNA from mice with or without 8-hour treatment with 200mg/Kg metformin compared with aged mice (20 months). Regularized log2 normalized counts. Ordinary one-way ANOVA p=0.0022, Tukey's multiple comparisons tests *Ndufs2*<sup>+/-</sup> with metformin vs *Ndufs2*<sup>+/+</sup> untreated, *Ndufs2*<sup>+/-</sup> untreated, 20 month *Ndufs2*<sup>+/+</sup>, and 20 month *Ndufs2*<sup>+/-</sup> \*p<sub>adjusted</sub><0.05. Tukey's not significant for all other comparisons.

**c)** Liver *Fgf21* mRNA from young mice with or without 8-hour treatment with 200mg/Kg metformin compared with aged mice (20 months). Regularized log2 normalized counts. Ordinary one-way ANOVA p=0.0296, Tukey's multiple comparisons tests not significant for all comparisons.

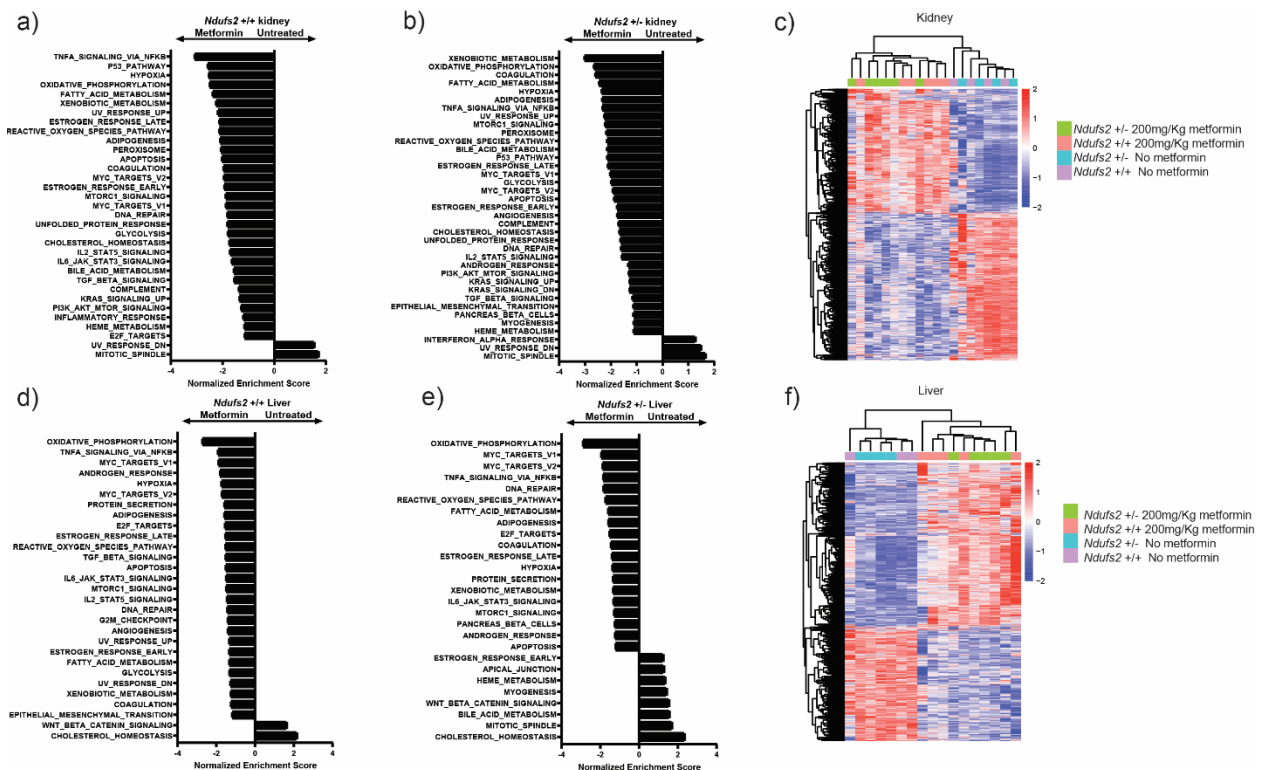

**Figure S9. Metformin-induced gene expression changes in liver and kidney at 8 hours**

**a)** *Ndufs2*<sup>+/+</sup> mouse differential gene expression analysis in kidney tissue from untreated mice versus mice 8 hours after treatment with 200mg/Kg metformin. GSEA MSigDB hallmark gene sets with FDR cutoff of 0.25. n=4-6

**b)** *Ndufs2*<sup>+/-</sup> mouse differential gene expression analysis in kidney tissue from untreated mice versus mice 8 hours after treatment with 200mg/Kg metformin. GSEA MSigDB hallmark gene sets with FDR cutoff of 0.25. n=4-6

**c)** Heatmap of gene expression analysis in mouse kidney tissue with or without 8-hour treatment with 200mg/Kg metformin. ANOVA-like test 1643 significant genes with FDR 0.05. Unsupervised clustering of columns and rows. n=4-6.

**d)** *Ndufs2*<sup>+/+</sup> mouse differential gene expression analysis in liver tissue from untreated mice versus mice 8 hours after treatment with 200mg/Kg metformin. GSEA MSigDB hallmark gene sets with FDR cutoff of 0.25. n=3-5

**e)** *Ndufs2*<sup>+/-</sup> mouse differential gene expression analysis in liver tissue from untreated mice versus mice 8 hours after treatment with 200mg/Kg metformin. GSEA MSigDB hallmark gene sets with FDR cutoff of 0.25. n=4-5

**f)** Heatmap of gene expression analysis in mouse liver tissue with or without 8-hour treatment with 200mg/Kg metformin. ANOVA-like test 1550 significant genes with FDR 0.05. Unsupervised clustering of columns and rows. n=3-5.
